# Supplementary material for: Design and development of a low-cost imidazole-based hole transporting material for perovskite solar cells
Source: Royal Society of Chemistry journal article supplement (doi:10.1039/d3ya00111c), 2023-01-01
Supplement: d3ya00111c1.pdf [file d3ya00111c1.pdf]

Supplementary Information for

# Design and Development of Low-Cost Imidazole-Based Hole Transporting Material for Perovskite Solar Cell

**Fatemeh Sadeghi<sup>a</sup>, Babak Pashaei<sup>b</sup>, Babak Nemati Bideh<sup>c</sup>, Negin Sabahi<sup>a</sup>, Hashem  
Shahroosvand<sup>a\*</sup>, Mohammad Khaja Nazeeruddin<sup>d\*</sup>**

<sup>a</sup>Group for Molecular Engineering of Advanced Functional Materials, Department of Chemistry, University of Zanjan, Zanjan, Iran

<sup>b</sup>Department of Inorganic Chemistry, Faculty of Chemistry, University of Mazandaran, Babolsar, Iran

<sup>c</sup>Inorganic Chemistry Department, Faculty of Chemistry, University of Bu-Ali Sina, Hamedan, Iran

<sup>d</sup>Group for Molecular Engineering of Functional Materials, Institute of Chemical Sciences and Engineering, Ecole polytechnique fédérale de Lausanne, CH-1951 Sion, Switzerland

*E-mail addresses:* [shahroos@znu.ac.ir](mailto:shahroos@znu.ac.ir) (H. Shahroosvand), [mdkhaja.nazeeruddin@epfl.ch](mailto:mdkhaja.nazeeruddin@epfl.ch) (Md. K.

Nazeeruddin)

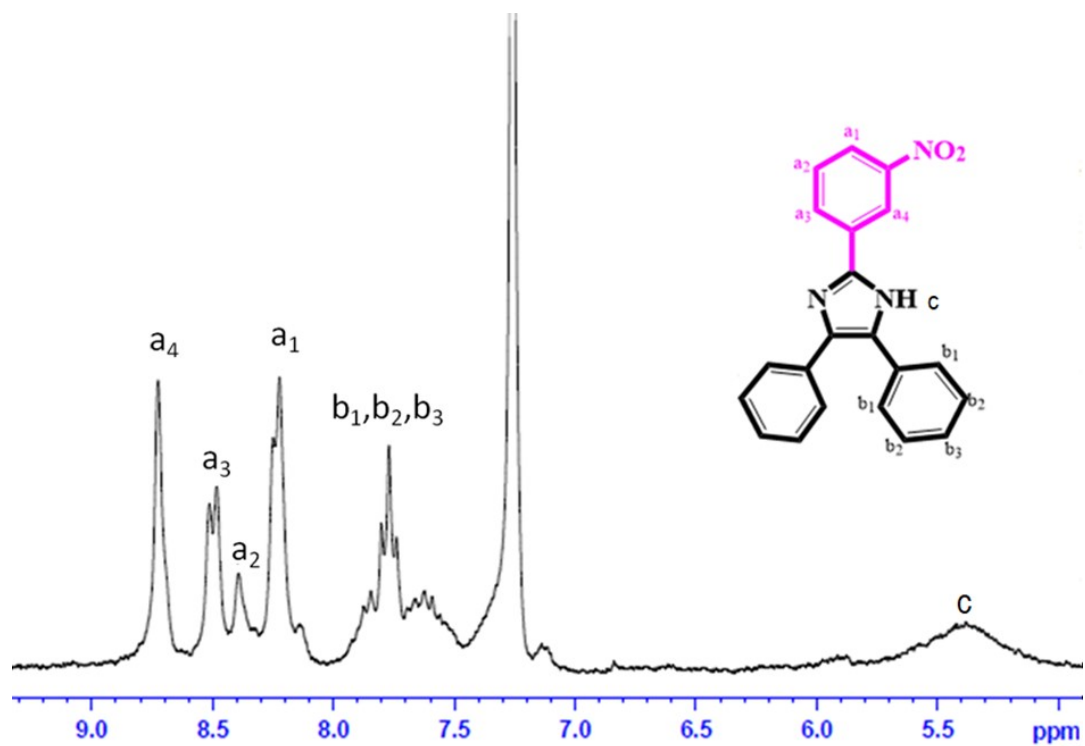

Fig. S1. <sup>1</sup>H NMR spectrum of HTM 1.

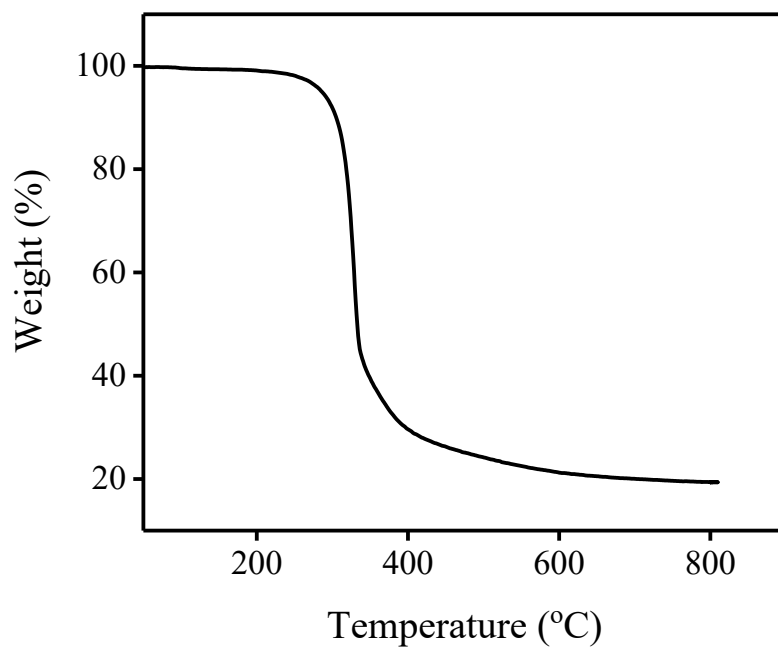

Fig. S2. TGA curve of the HTM 1 with scan rate of 10 °C min<sup>-1</sup> under N<sub>2</sub> atmosphere.

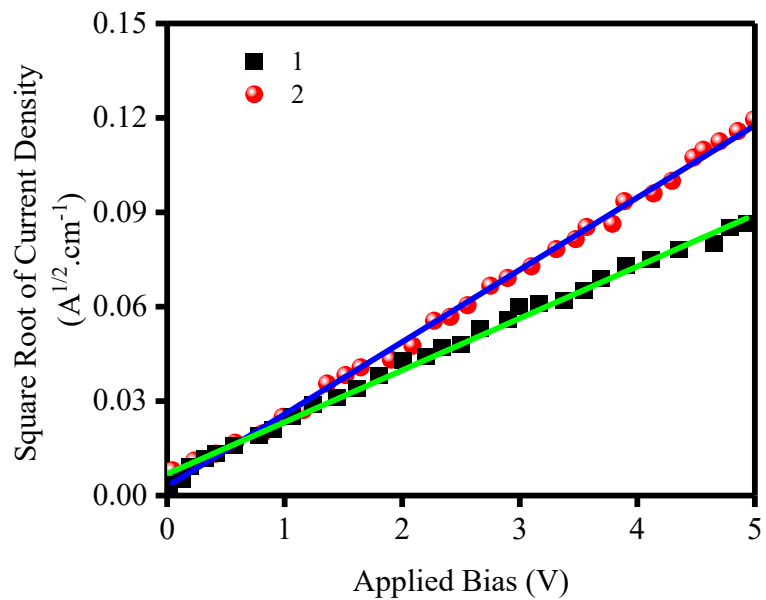

Fig. S3. Hole mobility measurements using space-charge limited currents for the devices fabricated with HTMs 1 and 2.

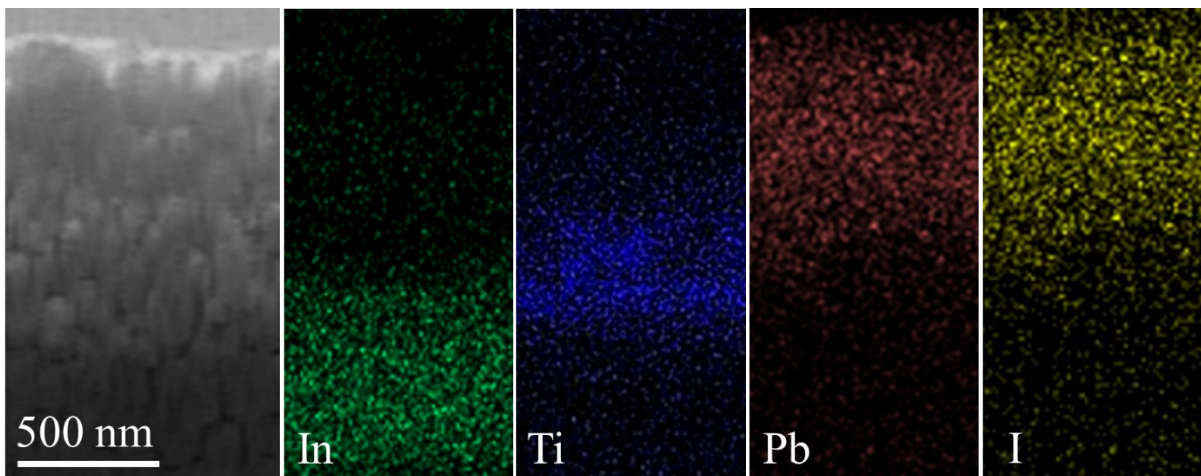

Fig. S4. Cross-sectional SEM images and corresponding EDX mapping images of the solar cell, indicating the distribution of elements In, Ti, Pb, and I.

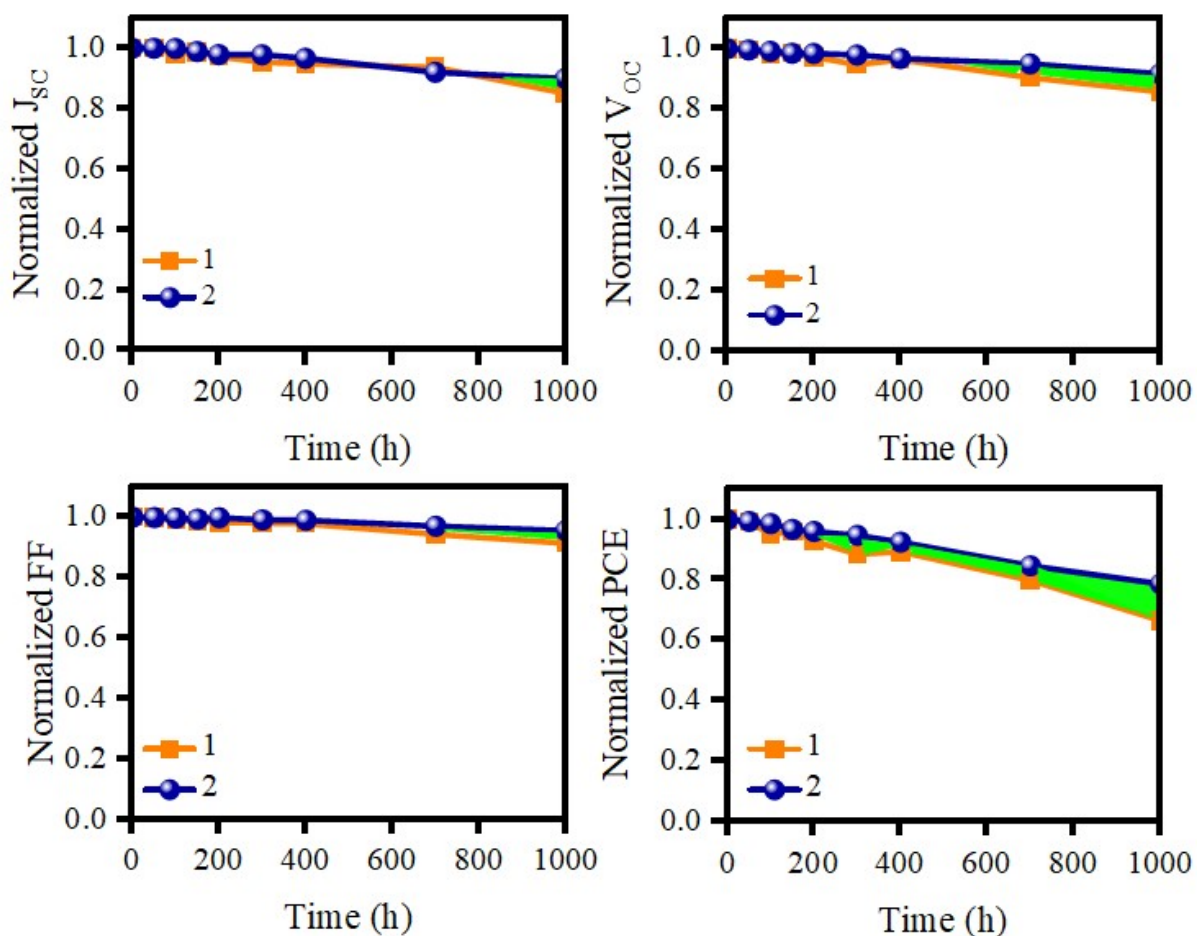

**Fig. S5.** Stability of the photovoltaic parameters of PSCs based on HTMs **1** and **2** under during exposure to full AM 1.5 simulated sunlight for 1000 hours (humidity  $\approx$  40%). Highlighted parts show the difference between photovoltaic performance of HTRMs **1**, and **2** over times.

**Table S1.** Quantities and cost of the materials used for the synthesis of 1 g of HTM **2**. Reproduced from ref. <sup>1</sup> with permission from the Royal Society of Chemistry, copyright 2016.

| Chemical name                                  | Weight reagent (g/g) | Weight solvent (g/g) | Weight workup (g/g) | Price of chemical (\$/kg) | Material cost (\$/g product) | Cost per step (\$/step) |
|------------------------------------------------|----------------------|----------------------|---------------------|---------------------------|------------------------------|-------------------------|
| 2,2',7,7'-tetrabromo-9,9'-spirobi[9H-fluorene] | 1.15                 |                      |                     | 95900.00                  | 110.29                       | 273.62                  |
| 4,4'-dimethoxydiphenylamine                    | 1.87                 |                      |                     | 54900.00                  | 102.66                       |                         |
| t-BuONa                                        | 1.04                 |                      |                     | 307.00                    | 0.32                         |                         |

|                                    |       |    |     |          |        |
|------------------------------------|-------|----|-----|----------|--------|
| Pd <sub>2</sub> (dba) <sub>3</sub> | 0.067 |    |     | 14900.00 | 1.00   |
| Toluene                            |       | 12 |     | 69.48    | 0.83   |
| Ethyl acetate                      |       |    | 135 | 80.16    | 10.82  |
| NaCl (brine)                       | 2     |    | 1   | 50.70    | 0.05   |
| MgSO <sub>4</sub>                  | 0.05  |    | 1   | 144.20   | 0.14   |
| Ethyl acetate                      | 1     |    | 120 | 80.16    | 9.62   |
| n-Hexane                           |       |    | 176 | 117.91   | 20.75  |
| Silica gel 60                      | 20    |    | 263 | 62.20    | 16.36  |
| Total                              |       |    |     |          | 273.62 |

**Table S2.** Quantities and costs of the materials used for the synthesis of 1 g of HTM **1** together with sum of costs HTM <sup>2, 3</sup>.

| Chemical name       | Weight reagent (g/g) | Weight solvent (g/g) | Weight workup (g/g) | Price of chemical (\$/kg) | Material cost (\$/g product) | Cost per step (\$/step) |
|---------------------|----------------------|----------------------|---------------------|---------------------------|------------------------------|-------------------------|
| Benzil              | 0.62                 |                      |                     | 120                       | 0.072                        |                         |
| 3-nitrobenzaldehyde | 0.44                 |                      |                     | 150                       | 0.066                        |                         |
| Ammonium Acetate    | 3.66                 |                      |                     | 90                        | 0.33                         | 1.66                    |
| Acetic Acid         |                      | 10.5                 | 5.50                | 50                        | 0.80                         |                         |
| Ethanol             |                      |                      | 15.78               | 25                        | 0.40                         |                         |
| Total               |                      |                      |                     |                           |                              | 1.66                    |

**Table S3.** The catalysts and cost for the synthesis of 1 g of organic HTMs and their photovoltaic characteristics.

| No. | HTM                                                                                 | Catalyst used for synthesis                                           | Cost per 1 g | Jsc (mA cm <sup>-2</sup> ) | Voc (V) | FF   | η (%) | Ref. |
|-----|-------------------------------------------------------------------------------------|-----------------------------------------------------------------------|--------------|----------------------------|---------|------|-------|------|
| 1   | 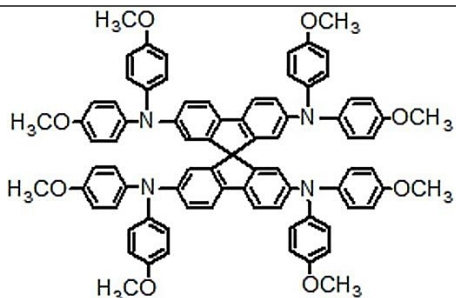 | t-BuONa<br>Pd <sub>2</sub> (dba) <sub>3</sub><br>P(t-Bu) <sub>3</sub> | 273.62       | 20.7                       | 1.00    | 0.71 | 14.9  | 4    |

|   |  |                                                                     |        |       |      |      |       |   |
|---|--|---------------------------------------------------------------------|--------|-------|------|------|-------|---|
| 2 |  | $\text{Pd(PPh}_3)_4$<br>$\text{K}_2\text{CO}_3$                     | 842.08 | 20.98 | 0.97 | 0.67 | 13.63 | 5 |
| 3 |  | $\text{Pd(PPh}_3)_4$<br>$\text{K}_2\text{CO}_3$                     | 420.22 | 20.88 | 0.95 | 0.62 | 12.31 | 5 |
| 4 |  | $\text{Pd(PPh}_3)_4$<br>$\text{K}_2\text{CO}_3$                     | 695.87 | 21.21 | 1.09 | 0.78 | 18.36 | 6 |
| 5 |  | $t\text{-BuONa}$<br>$\text{Pd(OAc)}_2$<br>$\text{P}(t\text{-Bu)}_3$ | 245.84 | 20.6  | 0.88 | 0.63 | 11.54 | 6 |

|    |                                                                                     |                                                                            |        |       |      |      |       |   |
|----|-------------------------------------------------------------------------------------|----------------------------------------------------------------------------|--------|-------|------|------|-------|---|
| 6  | 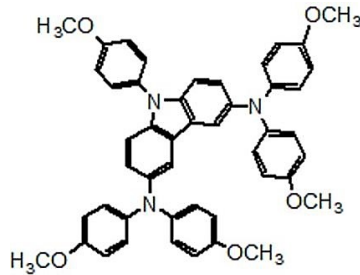   | t-BuONa<br>P(t-Bu) <sub>3</sub><br>Pd <sub>2</sub> (dba) <sub>3</sub>      | 148.57 | 20.4  | 1.13 | 0.68 | 15.8  | 7 |
| 7  |    | CuI<br>1,10-phenanthroline<br>K <sub>2</sub> CO <sub>3</sub>               | 216.46 | 23.2  | 1.02 | 0.79 | 18.6  | 7 |
| 8  |   | t-BuONa<br>Pd(OAc) <sub>2</sub><br>[(t-Bu) <sub>3</sub> PH]BF <sub>4</sub> | 168.42 | 21.0  | 0.92 | 0.67 | 12.92 | 8 |
| 9  |  | Pd(OAc) <sub>2</sub><br>Tri-t-butylphosphine<br>t-BuONa                    | 434.12 | 20.28 | 1.02 | 0.71 | 14.79 | 9 |
| 10 |  | Pd(OAc) <sub>2</sub><br>Tri-t-butylphosphine<br>t-BuONa                    | 450.13 | 20.35 | 0.99 | 0.69 | 13.86 | 9 |

|    |                                                                                     |                                    |        |       |      |      |       |               |
|----|-------------------------------------------------------------------------------------|------------------------------------|--------|-------|------|------|-------|---------------|
| 11 | 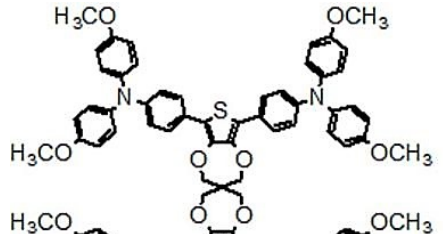   | $K_2CO_3$<br>$Pd(PPh_3)_4$         | 579.16 | 17.63 | 1.02 | 0.73 | 13.44 | <sup>10</sup> |
| 12 |    | $K_2CO_3$<br>$Pd(PPh_3)_4$         | 633.88 | 13.8  | 0.98 | 0.76 | 10.3  | <sup>11</sup> |
| 13 |   | $Pd_2(dba)_3$<br>X-Phos<br>t-BuONa | 376.30 | 20.4  | 1.04 | 0.72 | 16.0  | <sup>12</sup> |
| 14 |  | $Pd_2(dba)_3$<br>X-Phos<br>t-BuONa | 591.57 | 20.6  | 1.09 | 0.77 | 17.0  | <sup>12</sup> |



|    |                                                                                     |                                                                                                                              |        |      |      |      |      |    |
|----|-------------------------------------------------------------------------------------|------------------------------------------------------------------------------------------------------------------------------|--------|------|------|------|------|----|
| 15 | 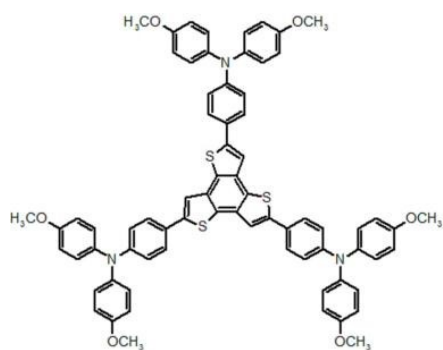   | <p><math>\text{Pd}(\text{PPh}_3)_4</math><br/> <math>\text{K}_3\text{PO}_4</math><br/> <math>\text{NH}_4\text{Cl}</math></p> | 800.49 | 21.9 | 1.07 | 0.77 | 18.2 | 12 |
| 16 |    | <p>Zn<br/> <math>\text{TiCl}_4</math></p>                                                                                    | 101.34 | 18.2 | 1.03 | 0.61 | 11.4 | 13 |
| 17 |   | <p>Zn<br/> <math>\text{TiCl}_4</math></p>                                                                                    | 52.59  | 21.2 | 0.92 | 0.67 | 13.1 | 13 |
| 18 |  | <p>t-BuONa<br/> <math>\text{P}(\text{t-Bu})_3</math><br/> <math>\text{Pd}(\text{OAc})_2</math></p>                           | 112.23 | 23.4 | 1.13 | 0.73 | 19.8 | 14 |
| 19 |  | <p><math>\text{AlCl}_3</math><br/> <math>\text{FeCl}_3</math></p>                                                            | 367.55 | 20.6 | 0.95 | 0.66 | 12.8 | 15 |

|    |                                                                                   |                                                               |       |       |      |      |       |           |
|----|-----------------------------------------------------------------------------------|---------------------------------------------------------------|-------|-------|------|------|-------|-----------|
| 20 | 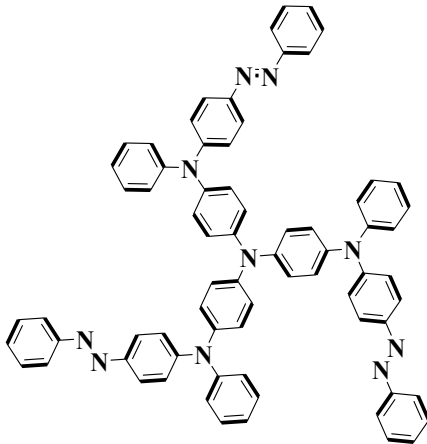 | CuI<br>Cs <sub>2</sub> CO <sub>3</sub><br>1,10-phenanthroline | 22.76 | 17.01 | 0.94 | 0.63 | 17.86 | 16        |
| 21 |  | -                                                             | 1.66  | 15.31 | 0.90 | 0.65 | 15.20 | This work |

1. C. H. Teh, R. Daik, E. L. Lim, C. C. Yap, M. A. Ibrahim, N. A. Ludin, K. Sopian and M. A. M. Teridi, *Journal of materials chemistry A*, 2016, **4**, 15788.
2. B. Xu, D. Bi, Y. Hua, P. Liu, M. Cheng, M. Grätzel, L. Kloo, A. Hagfeldt and L. Sun, *Energy and Environmental Sciences*, 2016, **9**, 873.
3. M. Saliba, S. Orlandi, T. Matsui, S. Aghazada, M. Cavazzini, J.-P. Correa-Baena, P. Gao, R. Scopelliti, E. Mosconi and K.-H. Dahmen, *Nature energy*, 2016, **1**, 15017.
4. N. J. Jeon, H. G. Lee, Y. C. Kim, J. Seo, J. H. Noh, J. Lee and S. I. Seok, *Journal of the American Chemical Society*, 2014, **136**, 7837.
5. H. Choi, S. Paek, N. Lim, Y. H. Lee, M. K. Nazeeruddin and J. Ko, *Chemistry—A European Journal*, 2014, **20**, 10894.
6. K. Rakstys, A. Abate, M. I. Dar, P. Gao, V. Jankauskas, G. n. Jacopin, E. Kamarauskas, S. Kazim, S. Ahmad and M. Grätzel, *Journal of the American Chemical Society*, 2015, **137**, 16172.
7. B. Xu, E. Sheibani, P. Liu, J. Zhang, H. Tian, N. Vlachopoulos, G. Boschloo, L. Kloo, A. Hagfeldt and L. Sun, *Advanced Materials*, 2014, **26**, 6629.
8. P. Gratia, A. Magomedov, T. Malinauskas, M. Daskeviciene, A. Abate, S. Ahmad, M. Grätzel, V. Getautis and M. K. Nazeeruddin, *Angewandte Chemie*, 2015, **54**, 11409.
9. S. Do Sung, M. S. Kang, I. T. Choi, H. M. Kim, H. Kim, M. Hong, H. K. Kim and W. I. Lee, *Chemical Communications*, 2014, **50**, 14161.
10. P. Ganesan, K. Fu, P. Gao, I. Raabe, K. Schenk, R. Scopelliti, J. Luo, L. H. Wong, M. Grätzel and M. K. Nazeeruddin, *Energy and Environmental Sciences*, 2015, **8**, 1986.
11. M. Franckevičius, A. Mishra, F. Kreuzer, J. Luo, S. M. Zakeeruddin and M. Grätzel, *Materials Horizons*, 2015, **2**, 613.

12. A. Molina-Ontoria, I. Zimmermann, I. Garcia-Benito, P. Gratia, C. Roldán-Carmona, S. Aghazada, M. Graetzel, M. K. Nazeeruddin and N. Martín, *Angewandte Chemie*, 2016, **55**, 6270.
13. H. Choi, K. Do, S. Park, J. S. Yu and J. Ko, *Chemistry–A European Journal*, 2015, **21**, 15919.
14. D. Bi, B. Xu, P. Gao, L. Sun, M. Grätzel and A. Hagfeldt, *Nano Energy*, 2016, **23**, 138.
15. J. Cao, Y.-M. Liu, X. Jing, J. Yin, J. Li, B. Xu, Y.-Z. Tan and N. Zheng, *Journal of the American Chemical Society*, 2015, **137**, 10914.
16. B. Pashaei, S. Bellani, H. Shahroosvand and F. Bonaccorso, *Chemical Science*, 2020, **11**, 2429.
